# Supplementary material
Source: publisher site journal article supplement (https://www.dovepress.com/get_supplementary_file.php?f=415621.docx)
Supplement: Supplementary file 1 [file get_supplementary_file.php]

**Supplemental material**

**Healthcare Utilization in Patients with Chronic Obstructive Pulmonary Disease Discharged from Coronavirus 2019 Hospitalization**

Puebla Neira DA1, Zaidan MF2, Nishi SP2, Duarte AG2, Lau C1, Parthasarathy S3, Wang J4, Kuo YF4, Sharma G2

**Authors and Affiliations:**

1. Division of Pulmonary, Critical Care and Sleep Medicine, University of Arizona College of Medicine-Phoenix, Phoenix, AZ, United States
2. Division of Pulmonary Critical Care and Sleep Medicine, University of Texas Medical Branch, Galveston, TX, United States
3. Division of Pulmonary, Critical Care and Sleep Medicine, University of Arizona College of Medicine-Tucson, Tucson, AZ, United States
4. Department of Biostatistics & Data Science, University of Texas Medical Branch, Galveston, TX, United States.

**Table S1.**ICD-10-CM Codes for Chronic Obstructive Pulmonary Disease

| **ICD-10-CM Codes** | **Description** |
| --- | --- |
| J41.8 | Mixed simple and mucopurulent chronic bronchitis |
| J42 | Unspecified chronic bronchitis |
| J43.0 | Unilateral pulmonary emphysema [MacLeod's syndrome] |
| J43.1 | Panlobular emphysema |
| J43.2 | Centrilobular emphysema |
| J43.8 | Other emphysema |
| J43.9 | Emphysema, unspecified |
| J44.0 | Chronic obstructive pulmonary disease with acute lower respiratory infection |
| J44.1 | Chronic obstructive pulmonary disease with (acute) exacerbation |
| J44.9 | Chronic obstructive pulmonary disease, unspecified |

Definition of abbreviations: ICD-10-CM= International Classification of Diseases, tenth revision, clinical modification.

**Table S2.** Sensitivity Analysis Using Individual Comorbidities in the Multivariable Model of the Risk of HCU a,b in Patients With COPDc,d Post-Discharge Home From COVID-19 Hospitalization

| Healthcare Utilization | Relative Risk (95% CI) |
| --- | --- |
| ED Visits | 1.36(1.33-1.40) |
| Readmissions | 1.31(1.28-1.35) |
| Readmission LOS | 1.35(1.34-1.37) |
| Rehabilitation/SNF Visits | 1.15(1.12-1.20) |
| Office Visits | 1.10(1.09-1.11) |
| Telemedicine Visits | 1.22(1.20-1.30) |

a. Risk of HCU in patients with COPD and adjusted on all covariates.

b. Multivariable Poisson regression model for all patients: log (HCU) = intercept+ Age + LOS + Sex + Race + Region + ICU + individual comorbidities + COPD + log(Person days), where LOS is the length of stay in the index COVID-19 hospitalization

c. Our cohort was obtained from Optum’s de-identified Clinformatics® Data Mart Database (CDM). It consists of 57,756 patients who were discharged home from a hospitalization due to COVID-19 from April 2020 until March 2021. From this, 14,622(25.3%) were identified as having COPD.

d. COPD was defined as having at least one inpatient or two outpatient diagnosis in the one year prior to COVID-19 diagnosis (see Table S1 in the online data supplement).

*Definition of abbreviations:* PACS= Post-acute COVID-19 syndrome. COVID-19= Coronavirus Disease 2019; COPD= Chronic Obstructive Pulmonary Disease; HCU: Healthcare Utilization; log= logarithm; ED: Emergency Department.

**Table S3.** Sensitivity Analysis Using Individual Comorbidities in the Multivariable Model of the Risk of HCU a,b in Patients With COPDc,d Post-Discharge Home From COVID-19 Hospitalization adjusted by Age.

| Healthcare Utilization | Age 18-64 | Age≥65 | Age-COPD interaction |
| --- | --- | --- | --- |
|  | Relative Risk (95% CI) | Relative Risk (95% CI) | P-Value |
| ED Visits | 1.62(1.54-1.70) | 1.31(1.30-1.34) | 0.0001 |
| Readmissions | 1.28(1.19-1.36) | 1.33(1.30-1.37) | 0.0001 |
| Readmission LOS | 1.50(1.44-1.52) | 1.32(1.30-1.34) | 0.0001 |
| Rehabilitation/SNF Visits | 1.42(1.24-1.64) | 1.13(1.10-1.20) | 0.0001 |
| Office Visits | 1.13(1.11-1.20) | 1.08(1.07-1.09) | 0.0001 |
| Telemedicine Visits | 1.37(1.30-1.50) | 1.20(1.15-1.22) | 0.0001 |

a. Risk of HCU in patients with COPD and adjusted on all covariates.

b. Multivariable Poisson regression model for all patients: log (HCU) = intercept+ Age + LOS + Sex + Race/ethnicitye,f + Region + ICU + individual comorbidities + COPD + log(Person days), where LOS is the length of stay in the index COVID-19 hospitalization

c. Our cohort was obtained from Optum’s de-identified Clinformatics® Data Mart Database (CDM). It consists of 57,756 patients who were discharged home from a hospitalization due to COVID-19 from April 2020 until March 2021. From this, 14,622(25.3%) were identified as having COPD.

d. COPD was defined as having at least one inpatient or two outpatient diagnosis in the one year prior to COVID-19 diagnosis (see Table S1 in the online data supplement).

e. Patients self-identifying as non-Hispanic ethnicity were categorized based on race (White, Black).

f. Patients self-identifying as Hispanic ethnicity were included in the Hispanic group regardless of race.

*Definition of abbreviations:* PACS= Post-acute COVID-19 syndrome. COVID-19= Coronavirus Disease 2019; COPD= Chronic Obstructive Pulmonary Disease; HCU: Healthcare Utilization; log= logarithm; ED: Emergency Department.

**Table S4.** Sensitivity Analysis Using Individual Comorbidities in the Multivariable Model of the Risk of HCU a,b in Patients With COPDc,d Post-Discharge Home From COVID-19 Hospitalization adjusted by Sex

| Healthcare Utilization | Male | Female | Sex-COPD interaction |
| --- | --- | --- | --- |
|  | Relative Risk (95% CI) | Relative Risk (95% CI) | P-value |
| ED Visits | 1.36(1.31-1.40) | 1.36(1.33-1.40) | 0.6007 |
| Readmissions | 1.30(1.22-1.32) | 1.40(1.30-1.41) | 0.0025 |
| Readmission LOS | 1.28(1.26-1.30) | 1.42(1.40-1.44) | 0.0001 |
| Rehabilitation/SNF Visits | 1.20(1.12-1.30) | 1.13(1.08-1.20) | 0.5397 |
| Office Visits | 1.08(1.07-1.09) | 1.12(1.10-1.13) | 0.0055 |
| Telemedicine Visits | 1.20(1.12-1.23) | 1.25(1.21-1.31) | 0.3304 |

a. Risk of HCU in patients with COPD and adjusted on all covariates.

b. Multivariable Poisson regression model for all patients: log (HCU) = intercept+ Age + LOS + Sex + Race/ethnicitye,f + Region + ICU + individual comorbidities + COPD + log(Person days), where LOS is the length of stay in the index COVID-19 hospitalization

c. Our cohort was obtained from Optum’s de-identified Clinformatics® Data Mart Database (CDM). It consists of 57,756 patients who were discharged home from a hospitalization due to COVID-19 from April 2020 until March 2021. From this, 14,622(25.3%) were identified as having COPD.

d. COPD was defined as having at least one inpatient or two outpatient diagnosis in the one year prior to COVID-19 diagnosis (see Table S1 in the online data supplement).

e. Patients self-identifying as non-Hispanic ethnicity were categorized based on race (White, Black).

f. Patients self-identifying as Hispanic ethnicity were included in the Hispanic group regardless of race.

*Definition of abbreviations:* PACS= Post-acute COVID-19 syndrome. COVID-19= Coronavirus Disease 2019; COPD= Chronic Obstructive Pulmonary Disease; HCU: Healthcare Utilization; log= logarithm; ED: Emergency Department.

**Table S5.** Sensitivity Analysis Using Individual Comorbidities in the Multivariable Model of the Risk of HCU a,b in Patients With COPDc,d Post-Discharge Home From COVID-19 Hospitalization adjusted by race.

| Healthcare Utilization | White | Black | Hispanic | Race/Ethnicity-COPD interaction |
| --- | --- | --- | --- | --- |
|  | Relative Risk(95% CI) | Relative Risk(95% CI) | Relative Risk(95% CI) | P-value |
| ED Visits | 1.37(1.34-1.41) | 1.32(1.30-1.40) | 1.40(1.30-1.50) | 0.004 |
| Readmissions | 1.31(1.30-1.40) | 1.30(1.21-1.40) | 1.40(1.30-1.52) | 0.6902 |
| Readmission LOS | 1.40(1.34-1.40) | 1.30(1.24-1.30) | 1.50(1.40-1.50) | 0.0001 |
| Rehabilitation/SNF Visits | 1.11(1.07-1.16) | 1.21(1.12-1.32) | 1.40(1.22-1.54) | 0.001 |
| Office Visits | 1.10(1.09-1.11) | 1.10(1.10-1.11) | 1.12(1.10-1.14) | 0.0016 |
| Telemedicine | 1.21(1.16-1.25) | 1.30(1.21-1.40) | 1.20(1.11-1.30) | 0.6454 |

a. Risk of HCU in patients with COPD and adjusted on all covariates.

b. Multivariable Poisson regression model for all patients: log (HCU) = intercept+ Age + LOS + Sex + Race/ethnicitye,f + Region + ICU + individual comorbidities + COPD + log(Person days), where LOS is the length of stay in the index COVID-19 hospitalization

c. Our cohort was obtained from Optum’s de-identified Clinformatics® Data Mart Database (CDM). It consists of 57,756 patients who were discharged home from a hospitalization due to COVID-19 from April 2020 until March 2021. From this, 14,622(25.3%) were identified as having COPD.

d. COPD was defined as having at least one inpatient or two outpatient diagnosis in the one year prior to COVID-19 diagnosis (see Table S1 in the online data supplement).

e. Patients self-identifying as non-Hispanic ethnicity were categorized based on race (White, Black).

f. Patients self-identifying as Hispanic ethnicity were included in the Hispanic group regardless of race.

*Definition of abbreviations:* PACS= Post-acute COVID-19 syndrome. COVID-19= Coronavirus Disease 2019; COPD= Chronic Obstructive Pulmonary Disease; HCU: Healthcare Utilization; log= logarithm; ED: Emergency Department.

**Table S6.** Health Care Utilizationa in Patients With COPDb,c from January to December 2019 .

| **HCU outcomes** | Visits per 10K persons-days |
| --- | --- |
| Emergency department visits | 41.8 |
| Readmissions | 16.9 |
| Length of stay during readmissionsd | 96.3 |
| Rehabilitation/SNF visits | 6.6 |
| Office visits | 297.3 |
| Telemedicine visits | 0.51 |

a. HCU is defined as visits to ED, readmissions (and readmission LOS), rehabilitation/SNF, office, and telemedicine visits and counted per 10K persons-days.

b. Our cohort was obtained from Optum’s de-identified Clinformatics® Data Mart Database (CDM). It consists of 57,756 patients who were discharged home from a hospitalization due to COVID-19 from April 2020 until March 2021. From this, 14,622(25.3%) were identified as having COPD.

c. COPD was defined as having at least one inpatient or two outpatient diagnosis in the one year prior to COVID-19 diagnosis (See Table S1 in the online data supplement)

d. Length of stay during readmissions is measured as inpatient days during readmission hospitalization per 10K persons-days.

*Definition of abbreviations:* COVID-19= Coronavirus Disease 2019; COPD= Chronic Obstructive Pulmonary Disease; HCU= Health Care Utilization; ED= Emergency Department; 10K=10,000; LOS=Length of stay; SNF= Skilled nursing facility
